# Supplementary material for: Intramembrane proteolysis mediates shedding of a key adhesin during erythrocyte invasion by the malaria parasite
Source: PubMed Central journal article supplement — J Cell Biol. 2006 Sep 25;174(7):1023–33. doi: 10.1083/jcb.200604136 (PMC2064393; doi:10.1083/jcb.200604136), 2006-09-25
Supplement: jcellbiol_jcb.200604136_4.pdf [file jcellbiol_jcb.200604136_4.pdf]

Table S1. Peptides identified by MALDI-TOF analysis of EBA-175 tryptic digests

| Peptide sequence <sup>a</sup> | residue numbers | calculated $m/z$ <sup>b</sup> | observed $m/z$ | $\pm$ ppm |
|-------------------------------|-----------------|-------------------------------|----------------|-----------|
| FNELDKKK                      | 41–48           | 1021.568                      | 1021.574       | 5.3       |
| IFTFIENK                      | 59–66           | 1011.551                      | 1011.538       | –13.7     |
| LDILNNSKFNK                   | 67–7            | 1305.717                      | 1305.710       | –5.4      |
| NTSSNNEVLSNCR                 | 147–159         | 1494.661                      | 1494.685       | 16.4      |
| SNYVCIPDRR                    | 176–185         | 1279.622                      | 1279.649       | 21.7      |
| TYTKETMK (Met ox)             | 198–205         | 1017.493                      | 1017.521       | 28.3      |
| FCNDLK                        | 231–236         | 796.366                       | 796.347        | –24.0     |
| IQEVFK                        | 264–269         | 763.435                       | 763.422        | –17.6     |
| GAHGEISEHK                    | 270–279         | 1064.512                      | 1064.546       | 31.8      |
| IKNFR                         | 280–284         | 677.410                       | 677.446        | 53.6      |
| KKWWNEFR                      | 285–292         | 1193.622                      | 1193.626       | 3.2       |
| LWEAMLSEHK                    | 295–304         | 1243.614                      | 1243.662       | 38.2      |
| EWHGELLER                     | 326–335         | 1315.643                      | 1325.683       | 30.1      |
| YRDWIIR                       | 366–372         | 1021.558                      | 1021.541       | –16.7     |
| SKFEWHTLSK                    | 373–382         | 1262.653                      | 1262.693       | 31.7      |
| ENAENYLIK                     | 392–400         | 1093.553                      | 1093.542       | –10.4     |
| HTTTLVK                       | 429–435         | 799.468                       | 799.438        | –37.7     |
| SVLNGNDNTIK                   | 436–446         | 1174.607                      | 1174.588       | –15.9     |
| DVCVPPR                       | 486–492         | 842.419                       | 842.449        | 34.9      |
| RQELCLGNIDR                   | 493–503         | 1373.696                      | 1373.724       | 20.6      |
| EHILAIAYESR                   | 514–525         | 1414.769                      | 1414.846       | 54.5      |
| TFADIR                        | 546–551         | 722.384                       | 722.401        | 23.8      |
| DIIGTDYWNLSNR                 | 552–566         | 1738.804                      | 1738.854       | 28.9      |
| INTNSNYVHR                    | 572–581         | 1217.603                      | 1217.628       | 20.5      |
| NKQNDKLFK                     | 582–590         | 1162.633                      | 1162.634       | 0.4       |
| LFRDEWWK                      | 588–595         | 1179.595                      | 1179.608       | 11.1      |
| TVCKEDDIENIPQFFR              | 613–628         | 2010.959                      | 2011.033       | 36.4      |
| WFSEWGDDYQCQDK                | 629–641         | 1735.670                      | 1735.731       | 35.1      |
| TKMIETLKVECK                  | 642–653         | 1479.791                      | 1479.864       | 49.4      |
| EKPCEDDNCKRK                  | 654–664         | 1450.605                      | 1450.639       | 23.1      |
| MYSEFK (Met ox)               | 698–703         | 820.355                       | 820.363        | 9.6       |
| SIKPEVYLK                     | 704–712         | 1076.636                      | 1076.608       | –25.3     |
| DVPISIIR                      | 747–754         | 912.552                       | 912.539        | –14.2     |
| NNEQTSQEAVPEESTEIAHR          | 755–774         | 2269.033                      | 2269.027       | –2.6      |
| GEDQTLGK                      | 834–841         | 847.416                       | 847.459        | 50.5      |
| SDAIPNIGEPETGISTTEESRHEEGHMK  | 842–869         | 3034.399                      | 3034.442       | 14.1      |
| KRDDDSLK                      | 932–940         | 1063.538                      | 1063.532       | –5.7      |
| ISVSPENSRPETDAKDTSNLLK        | 941–962         | 2401.221                      | 2401.320       | 41.4      |
| ISNNEYKVNER                   | 1088–1098       | 1365.676                      | 1365.713       | 26.9      |
| TVGDLGTTTHVQNEISVPVTGEIDEKLR  | 1174–1200       | 2907.506                      | 2907.568       | 21.2      |
| IHKAEER                       | 1207–1214       | 1011.522                      | 1011.511       | –11.6     |
| LSHTDIHKINPEDR                | 1215–1228       | 1674.856                      | 1674.902       | 27.1      |
| INPEDRNSNTLHLK                | 1223–1236       | 1650.856                      | 1650.890       | 20.1      |
| DIRNEENER                     | 1237–1245       | 1174.545                      | 1174.563       | 15.3      |
| HLTNQNINISQER                 | 1246–1258       | 1566.799                      | 1566.833       | 21.8      |
| HLTNQNINISQERDLQK             | 1246–1262       | 2051.063                      | 2051.04        | –11.5     |
| HGFHTMNNLHGDGVSER             | 1263–1279       | 1907.857                      | 1907.828       | –15.0     |
| HGFHTMNNLHGDGVSER (Met ox)    | 1263–1279       | 1923.852                      | 1923.917       | 34.0      |
| SQINHSHHGK                    | 1280–1290       | 1286.610                      | 1286.642       | 24.3      |
| SQINHSHHGKQDR                 | 1280–1293       | 1685.797                      | 1685.851       | 32.3      |
| GGNSGNVLNMR                   | 1294–1304       | 1134.532                      | 1134.560       | 24.4      |
| SNNNNFNNIPSR                  | 1305–1316       | 1390.646                      | 1390.682       | 25.5      |
| YNLYDK                        | 1317–1322       | 815.394                       | 815.401        | 9.2       |
| LDLDLYENRNDSTTK               | 1324–1338       | 1796.867                      | 1796.920       | 29.6      |
| EFDDPSYTCFR                   | 1406–1416       | 1436.579                      | 1436.609       | 21.0      |
| EFDDPSYTCFRK                  | 1406–1417       | 1564.674                      | 1564.701       | 17.3      |

<sup>a</sup>Note that the predicted TMD of EBA-175 extends from Tyr1425-Ser1442.

<sup>b</sup>All calculated  $m/z$  values for cysteine-containing peptides are for the carbamidomethylated form.

**Table S2.** Oligonucleotide primers used in this study.

| Name                                                       | Sequence (5'-3')                                                                      | Restriction sites |                         |                   |                |
|------------------------------------------------------------|---------------------------------------------------------------------------------------|-------------------|-------------------------|-------------------|----------------|
|                                                            |                                                                                       | <b>Bold</b>       | <b>Bold and italics</b> | <b>underlined</b> | <b>italics</b> |
| PPeba-A                                                    | CCGGAATTCGACGACAGCACCACC<br>AAGGAGCTGATCAAG                                           |                   |                         | EcoRI             |                |
| PPeba-B                                                    | GCTACGCGGCCGCTAATGATGGTG<br>ATGGTGGTGCATGCTGCTGAAGGCT<br>TCCTTCCGGAA                  | NotI              |                         |                   |                |
| HAROMtagF                                                  | <i>GCTNAGCCCTAGGCTTAAGGCATA</i><br>CCCTTACGATGTTCTGAC                                 | AvrII             |                         | AflIII            | EspI           |
| HAROMtagR                                                  | <b><i>CTCGAGGGCGCCTTAATGAGCGTA</i></b><br>ATCTGGAACGTCG                               |                   | XhoI                    |                   |                |
| PfROM1F                                                    | <b>CCTAGGTCGTTATTTCTATTATAACA</b><br>GTTGATTG                                         | AvrII             |                         |                   |                |
| PfROM1R                                                    | <u>CTTAAGACATGTACGAGGTATTGTA</u><br>AATAAAACGAC                                       |                   |                         | AflIII            |                |
| PfROM4upF                                                  | AGATCTGACAATTATATATATATAT<br>ATATATGAAC                                               |                   |                         |                   | BglIII         |
| PfROM4upR                                                  | <b>CTCGAGTGTTAAATGTAATAGTGA</b><br>ATAAATAATTTTAAC                                    | XhoI              |                         |                   |                |
| pSecHAfor                                                  | GGTACCCTTACGATGTTCTGACTA<br>TGCG                                                      |                   |                         |                   |                |
| pSecHArev                                                  | AGAGTCGACATATGGAATTCAGCGT<br>AATCTGG                                                  |                   |                         | EcoRI             |                |
| EBA-175-S <sub>3208</sub><br>pHH1-Pbdt-AS<br>EBAactivefor1 | GAGAGGGAAGATGAGAGAACG<br>CATGCATGTGCATGCAC<br>GCAGCATGCCCTACTACTACGGAG<br>CCGGCGTGCTG |                   |                         |                   |                |
| EBAactiverrev1                                             | CAGCACGCCGGCTCCGTAGTAGTA<br>GGGCATGCTGC                                               |                   |                         |                   |                |
| EBAmut12for                                                | GACAGCGAGGAGTACTACGACTGC<br>ACCAAGCGGGAGTTTCG                                         |                   |                         |                   |                |
| EBAmut12rev                                                | CGAACTCCCGCTTGGTGCAGTCGTA<br>GTACTCCTCGCTGTC                                          |                   |                         |                   |                |
| EBAmut13for                                                | GATTACGCTGAATTCGACGACAGC<br>ACCACC                                                    |                   |                         |                   |                |
| EBAmut13rev                                                | GGTGGTGCTGTGTCGAATTCAGCG<br>TAATC                                                     |                   |                         |                   |                |
| EBATMmutfor1                                               | GCATGCCCTACTACGCCTTCTTCGG<br>CGTGCTGTTCA                                              |                   |                         |                   |                |
| EBATMmutrev1                                               | TGAACAGCACGCCGAAGAAGGCGT<br>AGTAGGGCATGC                                              |                   |                         |                   |                |
| EBATMmutfor2                                               | GGTGATCCTGTTCTTCAGCCAGGCC<br>AAGTA                                                    |                   |                         |                   |                |
| EBATMmutrev2                                               | TACTTGGCCTGGCTGAAGAACAGG<br>ATCACC                                                    |                   |                         |                   |                |
| ROM4mutfor                                                 | TGCGGCGTGACAATTGGCGCCGCA<br>GGGAGTCTGTATGGG                                           |                   |                         |                   |                |
| ROM4mutrev                                                 | CCCATACAGACTCCCTGCGGCGCC<br>AATTGTCACGCCGCA                                           |                   |                         |                   |                |
| EBA175GA1/FF-S                                             | ATGCCATATTATGCATTTTTTGGTGT<br>GTTATTTATTATATTGG                                       |                   |                         |                   |                |
| EBA175GA1/FF-<br>AS                                        | CCAATATAATAAATAACACACCAA<br>AAAATGCATAATATGGCAT                                       |                   |                         |                   |                |
| EBA175GA2/FF-S                                             | GGTGTGTTATTTATTATATTGGTTAT<br>TTTATTTTTTTTACAAGCC                                     |                   |                         |                   |                |
| EBA175 GA2/FF-<br>AS                                       | GGCTTGTGAAAAAATAAAAATAAC<br>CAATATAATAAATAACACACC                                     |                   |                         |                   |                |
| EBA175-S <sub>3443</sub>                                   | TGAGGATCCAGGAAATGATACATCT<br>GAAATGTGCGC                                              |                   |                         | BamHI             |                |
| EBA175-AS                                                  | AGTCTCGAGTCATATCTTAAATTTA<br>ATATCATT                                                 |                   |                         | XhoI              |                |
| HH1-S                                                      | GCTCAGAGATTGCATGCAAGC                                                                 |                   |                         |                   |                |
| HH1-AS                                                     | CATGCATGTGCATGCAC                                                                     |                   |                         |                   |                |
| 175 <sub>3259</sub> -S                                     | GGGAAGATGAGAGAACG                                                                     |                   |                         |                   |                |
| 175-AS <sub>stop</sub> )                                   | TCATATCTTAAATTTAATATC                                                                 |                   |                         |                   |                |
